# Supplementary material for: Climatic suitability influences species specific abundance patterns of Australian flying foxes and risk of Hendra virus spillover
Source: PubMed Central journal article supplement — One Health. 2016 Jul 29;2:115–21. doi: 10.1016/j.onehlt.2016.07.004 (PMC5441320; doi:10.1016/j.onehlt.2016.07.004), 2016-07-29
Supplement: mmc1.pdf [file mmc1.pdf]

# Supporting information: bioclimatic suitability of flying foxes habitat and Hendra virus spillover

## Bioclimatic variables used for each species

Table 1: Variables selected for each species as described in methods.

| Variable     | Meaning                                              | <i>P. alecto</i> | <i>P. conspicillatus</i> | <i>P. poliocephalus</i> | <i>P. scapulatus</i> | HeV |
|--------------|------------------------------------------------------|------------------|--------------------------|-------------------------|----------------------|-----|
| <i>bio1</i>  | Annual Mean Temperature                              | ✓                |                          | ✓                       |                      |     |
| <i>bio2</i>  | Mean Diurnal Temperature Range                       | ✓                | ✓                        | ✓                       | ✓                    | ✓   |
| <i>bio3</i>  | Isothermality (BIO2/BIO7) (* 100)                    |                  |                          | ✓                       |                      |     |
| <i>bio4</i>  | Temperature Seasonality (standard deviation *100)    |                  | ✓                        |                         |                      |     |
| <i>bio5</i>  | Max Temperature of Warmest Month                     |                  |                          | ✓                       | ✓                    | ✓   |
| <i>bio6</i>  | Min Temperature of Coldest Month                     |                  |                          | ✓                       |                      |     |
| <i>bio7</i>  | Temperature Annual Range (BIO5-BIO6)                 | ✓                | ✓                        |                         |                      |     |
| <i>bio8</i>  | Mean Temperature of Wettest Quarter                  |                  |                          | ✓                       | ✓                    |     |
| <i>bio9</i>  | Mean Temperature of Driest Quarter                   |                  |                          |                         | ✓                    | ✓   |
| <i>bio10</i> | Mean Temperature of Warmest Quarter                  |                  |                          |                         |                      |     |
| <i>bio11</i> | Mean Temperature of Coldest Quarter                  |                  |                          |                         |                      |     |
| <i>bio12</i> | Annual Precipitation                                 | ✓                |                          |                         | ✓                    |     |
| <i>bio13</i> | Precipitation of Wettest Month                       |                  | ✓                        |                         |                      |     |
| <i>bio14</i> | Precipitation of Driest Month                        | ✓                |                          |                         |                      |     |
| <i>bio15</i> | Precipitation Seasonality (Coefficient of Variation) |                  |                          |                         | ✓                    | ✓   |
| <i>bio16</i> | Precipitation of Wettest Quarter                     |                  | ✓                        |                         |                      |     |
| <i>bio17</i> | Precipitation of Driest Quarter                      |                  |                          |                         |                      |     |
| <i>bio18</i> | Precipitation of Warmest Quarter                     | ✓                |                          |                         | ✓                    | ✓   |
| <i>bio19</i> | Precipitation of Coldest Quarter                     |                  | ✓                        | ✓                       |                      |     |

## Spatial patterns used for model training and testing

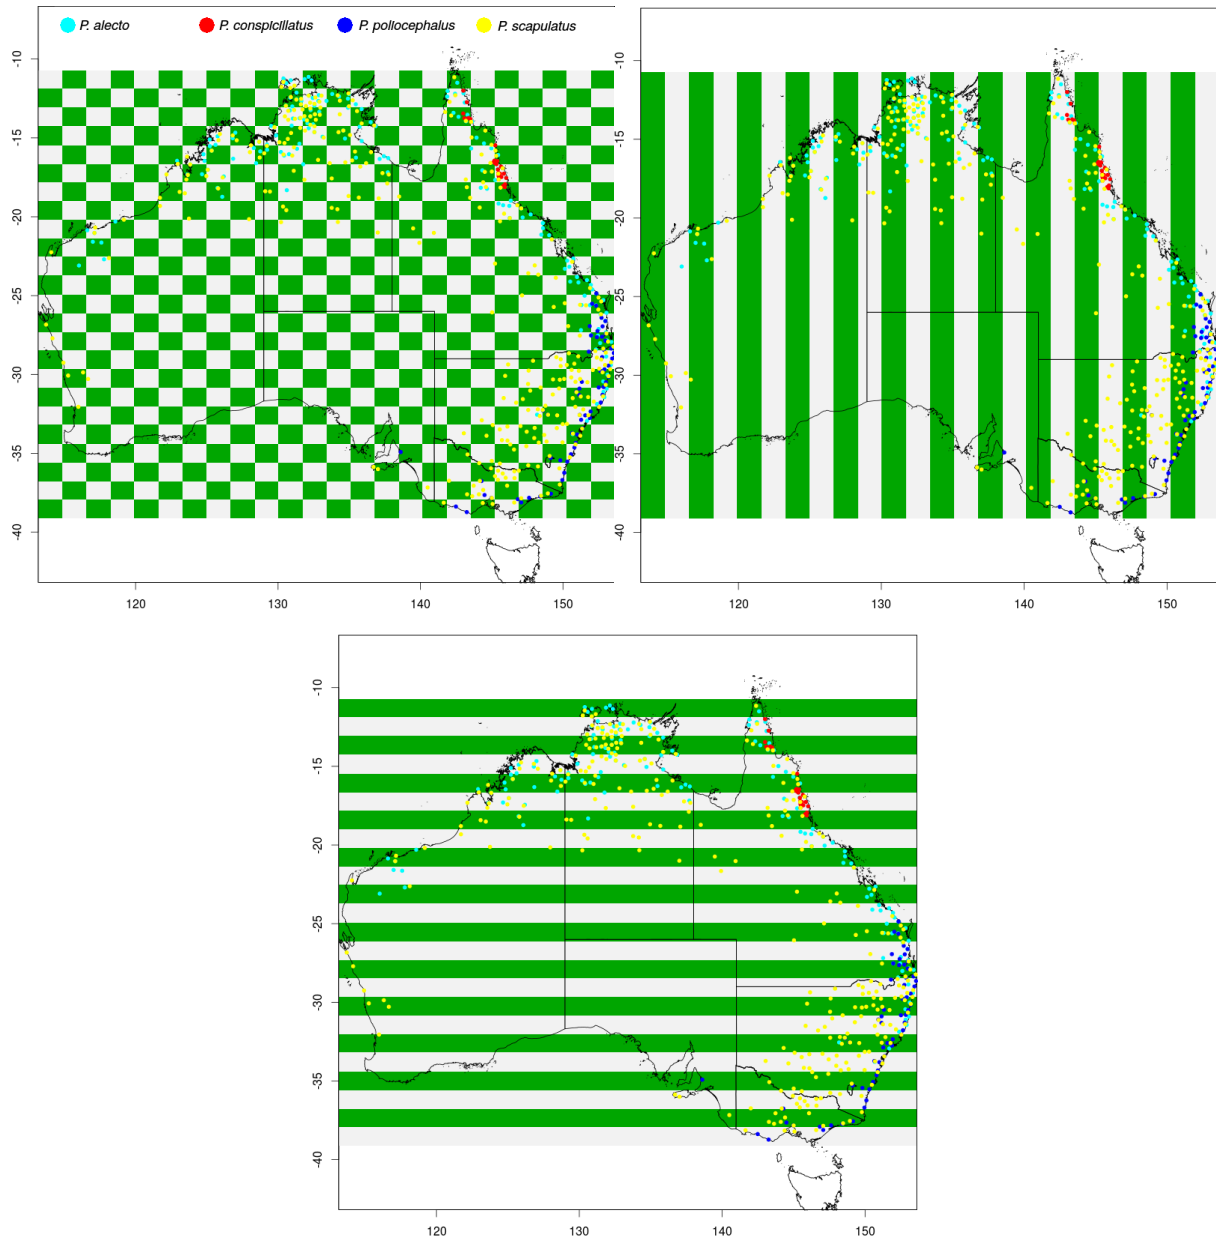

Figure 1. Spatial patterns used to select training and testing data. Colour points represent the four FF species presence points used to train models after filtering to reduce spatial autocorrelation.

## Performance of best models

Table 2: Performance of models selected. *P* values indicate the probability that the measured AUC ratio is less than 1 (the random prediction threshold) out of a maximum possible value of 2. In 1000 bootstraps the proportion of models with an AUC ratio < 1 is another measure of statistical

significance of the test. *Pteropus conspicillatus* was tested with a jackknife procedure.

| Species                 | AUC ratio | S.D. | P | Proportion iterations < 1 |
|-------------------------|-----------|------|---|---------------------------|
| <i>P. alecto</i>        | 1.45      | 0.08 | 0 | 0                         |
| <i>P. scapulatus</i>    | 1.35      | 0.05 | 0 | 0                         |
| <i>P. poliocephalus</i> | 1.58      | 0.11 | 0 | 0                         |

Table 3. Jackknife data used to validate *P. conspicillatus* model. Prediction rate of 0.92 (average omission rate of 0.8),  $P = 0$ .

| Test point | Proportion area predicted | Test point | Proportion area predicted |
|------------|---------------------------|------------|---------------------------|
| 1          | 0.2352693898              | 1          | 0.235899951               |
| 1          | 0.2379317593              | 1          | 0.2527149163              |
| 1          | 0.2211167939              | 1          | 0.2810201079              |
| 1          | 0.2246899741              | 0          | 0.2495621103              |
| 1          | 0.2614026484              | 1          | 0.2459188678              |
| 1          | 0.2374413228              | 1          | 0.2220276046              |
| 1          | 0.2179639879              | 1          | 0.2737336229              |
| 1          | 0.2445176207              | 1          | 0.2303650249              |
| 1          | 0.2773068031              | 1          | 0.2525747916              |
| 1          | 0.3039304981              | 1          | 0.2292440272              |
| 1          | 0.2951026414              | 1          | 0.2520843551              |
| 1          | 0.2272822812              | 1          | 0.245568556               |
| 0          | 0.2024802074              | 1          | 0.2251103482              |
| 1          | 0.2341483921              |            |                           |

Table 4. Distances to each species' centroids at the location of spillover events. The Kruskal wallis test intended to show that there are significant differences between species' DNC as evidence of greater association with HeV.

| Spillover event | <i>P. alecto</i> | <i>P. conspicillatus</i> | <i>P. poliocephalus</i> | <i>P. scapulatus</i> | Minimum distance         |
|-----------------|------------------|--------------------------|-------------------------|----------------------|--------------------------|
| 1               | 5.3378609373     | 2.0608370502             | 11.7284151214           | 6.3683779325         | <i>P. conspicillatus</i> |
| 2               | 1.7242371724     | 16.7547937523            | 3.0736370577            | 2.1999593564         | <i>P. alecto</i>         |
| 3               | 1.9786841497     | 4.6784806044             | 12.4348779627           | 2.4110835646         | <i>P. alecto</i>         |
| 4               | 1.862397829      | 9.5371496092             | 17.34425031             | 3.2799188377         | <i>P. alecto</i>         |
| 5               | 3.5268589296     | 22.590081733             | 4.0645363201            | 2.4194593175         | <i>P. scapulatus</i>     |
| 6               | 2.3612793677     | 23.5458505055            | 2.4577651498            | 1.0724874264         | <i>P. scapulatus</i>     |
| 7               | 2.7019279402     | 28.7587918178            | 5.6553650656            | 3.4192612445         | <i>P. alecto</i>         |
| 8               | 1.3628660926     | 24.9629570367            | 2.6513789046            | 1.967012115          | <i>P. alecto</i>         |
| 9               | 4.6406867346     | 32.0148873395            | 5.7301276137            | 1.649617618          | <i>P. scapulatus</i>     |

|    |              |               |               |              |                          |
|----|--------------|---------------|---------------|--------------|--------------------------|
| 10 | 1.9963440475 | 23.0686633191 | 3.0661586038  | 2.4810369866 | <i>P. alecto</i>         |
| 11 | 2.3358903246 | 29.6367344474 | 3.8693518006  | 3.1539513424 | <i>P. alecto</i>         |
| 12 | 1.5150527128 | 25.0224868495 | 2.6600498686  | 2.1504162905 | <i>P. alecto</i>         |
| 13 | 1.978225318  | 4.9354574887  | 19.1765322354 | 3.2916636042 | <i>P. alecto</i>         |
| 14 | 3.1305652337 | 3.413093958   | 11.1965212264 | 3.656908625  | <i>P. alecto</i>         |
| 15 | 2.8799202334 | 3.3244337457  | 12.9351282905 | 2.2982371657 | <i>P. scapulatus</i>     |
| 16 | 1.6425273756 | 21.0182273399 | 7.8396541016  | 2.0265268391 | <i>P. alecto</i>         |
| 17 | 3.2282839327 | 1.9868616657  | 12.3936342845 | 3.807534739  | <i>P. conspicillatus</i> |
| 18 | 3.4908804042 | 2.4810350429  | 11.0169336043 | 3.9579914047 | <i>P. conspicillatus</i> |
| 19 | 1.399550698  | 9.8364951405  | 11.4480224992 | 1.8665053486 | <i>P. alecto</i>         |
| 20 | 3.550425979  | 1.5409291413  | 9.3790484644  | 3.4596168151 | <i>P. conspicillatus</i> |
| 21 | 1.3308690772 | 20.6190381131 | 1.5666768181  | 1.4110347145 | <i>P. alecto</i>         |
| 22 | 2.7334669983 | 26.8232258622 | 2.6322680235  | 0.6215221819 | <i>P. scapulatus</i>     |
| 23 | 1.1891054827 | 22.3968525276 | 2.1087483904  | 1.7058767457 | <i>P. alecto</i>         |
| 24 | 1.6041437369 | 20.7127499489 | 1.2055787599  | 1.0276671388 | <i>P. scapulatus</i>     |
| 25 | 1.8689899487 | 25.0144936757 | 1.6563401201  | 1.6425312935 | <i>P. scapulatus</i>     |
| 26 | 1.4124156699 | 24.1628136    | 4.8941808435  | 2.0007800599 | <i>P. alecto</i>         |
| 27 | 1.208672631  | 26.3904097129 | 1.428703113   | 1.3808124008 | <i>P. alecto</i>         |
